# Supplementary material
Source: PubMed Central journal article supplement (PMC218770)

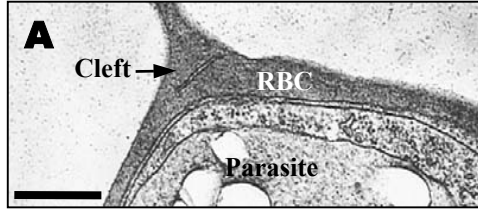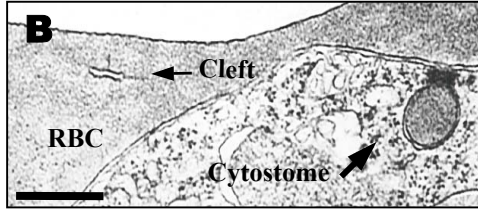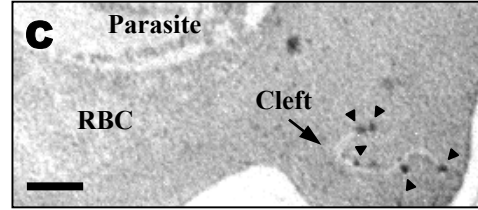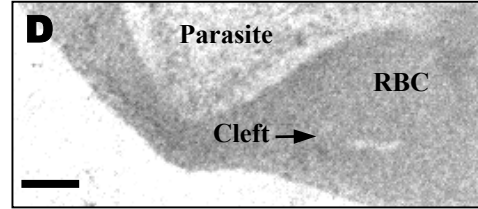

Supplement: pnas_2133080100_7.pdf [file pnas_2133080100_7.pdf]
